# Supplementary material
Source: MDPI journal article supplement (https://www.mdpi.com/2077-1312/10/11/1643)
Supplement: s1 [file s1]

## Supplementary Materials

**Table S1.** SIMPER results of the first transect (TL-1).

Habitat contribution values were calculated using SIMPER test as implemented in software program PRIMER based on the square root transformed coverage data of benthic habitat types of TL-1.

| Habitat type    | Contribution of SIMPER procedure (%) |         |         |
|-----------------|--------------------------------------|---------|---------|
|                 | Group A                              | Group B | Group C |
| Sand            | 46.0                                 | 14.4    | –       |
| Rubble          | –                                    | 13.2    | 23.6    |
| Dead coral      | –                                    | 9.4     | –       |
| Rock            | –                                    | –       | –       |
| Hard coral      | –                                    | 11.6    | 15.4    |
| Soft coral      | –                                    | –       | –       |
| Macroalgae      | –                                    | 14.2    | –       |
| Coralline algae | –                                    | 7.5     | 12.0    |
| Turf algae      | –                                    | 10.0    | 15.8    |
| <i>Halimeda</i> | –                                    | 13.0    | 32.5    |
| Seagrass        | 48.9                                 | –       | –       |
| Macrofauna      | –                                    | –       | –       |
| Indeterminate   | –                                    | –       | –       |
| Similarity      | 77.1                                 | 82.3    | 66.6    |

**Table S2.** ANOSIM results of the first transect (TL-1).

ANOSIM was performed on Bray-Curtis similarity matrix based on square root transformed coverage data of benthic habitat types as determined by digital imaging analysis of the 25 photo quadrats (i.e., sampling points) along TL-1.

Sample statistic (Global R): 0.965

Significance level of sample statistic: 0.001

| Variable        | Comparison | Global R | p-value |
|-----------------|------------|----------|---------|
| Between Cluster | A vs B     | 0.984    | 0.002   |
|                 | A vs C     | 1.0      | 0.001   |
|                 | B vs C     | 0.648    | 0.029   |

**Table S3.** SIMPER results of the second transect (TL-2).

Habitat contribution values were calculated using SIMPER test as implemented in software program PRIMER based on the square root transformed coverage data of benthic habitat types of TL-2.

|                 | Contribution of SIMPER procedure (%) |         |         |         |         |
|-----------------|--------------------------------------|---------|---------|---------|---------|
|                 | Group A                              | Group B | Group C | Group D | Group E |
| Sand            | 33.0                                 | 66.0    | 57.2    | 29.4    | 6.5     |
| Rubble          | –                                    | –       | –       | 10.0    | 48.8    |
| Dead coral      | –                                    | –       | –       | 7.8     | –       |
| Rock            | –                                    | –       | –       | –       | –       |
| Hard coral      | –                                    | –       | –       | 23.0    | –       |
| Soft coral      | –                                    | –       | 36.8    | –       | –       |
| Macroalgae      | 10.0                                 | –       | –       | –       | –       |
| Coralline algae | –                                    | –       | –       | 7.5     | 10.3    |
| Turf algae      | –                                    | 16.6    | –       | 10.1    | 16.6    |
| <i>Halimeda</i> | –                                    | 10.6    | –       | 8.9     | 14.0    |
| Seagrass        | 49.4                                 | –       | –       | –       | –       |
| Macrofauna      | –                                    | –       | –       | –       | –       |
| Indeterminate   | –                                    | –       | –       | –       | –       |
| Similarity      | 72.9                                 | 83.9    | 78.6    | 66.7    | 68.6    |

**Table S4.** ANOSIM results of the second transect (TL-2).

ANOSIM was performed on Bray-Curtis similarity matrix based on square root transformed coverage data of benthic habitat types as determined by digital imaging analysis of the 93 photo quadrats (i.e., sampling points) along TL-2.

Sample statistic (Global R): 0.890

Significance level of sample statistic: 0.001

| Variable        | Comparison | Global R | p-value |
|-----------------|------------|----------|---------|
| Between Cluster | A vs B     | 0.805    | 0.001   |
|                 | A vs C     | 0.955    | 0.001   |
|                 | A vs D     | 0.982    | 0.001   |
|                 | A vs E     | 0.997    | 0.001   |
|                 | B vs C     | 0.951    | 0.001   |
|                 | B vs D     | 0.917    | 0.001   |
|                 | B vs E     | 0.992    | 0.001   |
|                 | C vs D     | 0.783    | 0.001   |
|                 | C vs E     | 0.999    | 0.001   |
|                 | D vs E     | 0.707    | 0.001   |

**Table S5.** SIMPER results of the third transect (TL-3).

Habitat contribution values were calculated using SIMPER test as implemented in software program PRIMER based on the square root transformed coverage data of benthic habitat types of TL-3.

| Contribution of SIMPER procedure (%) |         |         |         |         |
|--------------------------------------|---------|---------|---------|---------|
|                                      | Group A | Group B | Group C | Group D |
| Sand                                 | 21.5    | 76.2    | 46.2    | –       |
| Rubble                               | –       | –       | 11.8    | 44.0    |
| Dead Coral                           | –       | –       | –       | –       |
| Rock                                 | –       | –       | –       | –       |
| Hard Coral                           | –       | –       | 21.8    | –       |
| Soft Coral                           | –       | 7.5     | –       | –       |
| Macro Algae                          | –       | –       | –       | –       |
| Coralline Algae                      | –       | –       | –       | 12.6    |
| Turf Algae                           | –       | 5.4     | 11.7    | 19.3    |
| Halimeda                             | –       | 5.6     | –       | 18.3    |
| Seagrass                             | 73.2    | –       | –       | –       |
| Macro Fauna                          | –       | –       | –       | –       |
| Indeterminate                        | –       | –       | –       | –       |
| Similarity                           | 81.4    | 77.4    | 68.8    | 70.7    |

**Table S6.** ANOSIM results of the third transect (TL-3).

ANOSIM was performed on Bray-Curtis similarity matrix based on square root transformed coverage data of benthic habitat types as determined by digital imaging analysis of the 49 photo quadrats (i.e., sampling points) along TL-3.

Sample statistic (Global R): 0.982

Significance level of sample statistic: 0.001

| Variable        | Comparison | Global R | p-value |
|-----------------|------------|----------|---------|
| Between Cluster | A vs B     | 0.988    | 0.001   |
|                 | A vs C     | 1.0      | 0.001   |
|                 | A vs D     | 1.0      | 0.001   |
|                 | B vs C     | 0.863    | 0.001   |
|                 | B vs D     | 1.0      | 0.001   |
|                 | C vs D     | 0.92     | 0.008   |
